# Supplementary material
Source: MDPI journal article supplement (https://www.mdpi.com/2073-4395/13/6/1662)
Supplement: s1 [file s1]

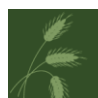

## Supplementary Materials

**Table S1.** ANOVA results of the origin (D, HU, UK) and cycling history effects on the F<sub>13</sub> and F<sub>14</sub> winter wheat CCPs in 2014/15 (Neu-Eichenberg, Germany), including mean squares (MS) and significance levels (\*p<0.05, \*\*p<0.01, \*\*\*p<0.001). Significant effects are marked in bold.

|                    | Df | Yield           | HI             | RAUDPC          | TKW             | Ears_m <sup>2</sup> |
|--------------------|----|-----------------|----------------|-----------------|-----------------|---------------------|
|                    |    | MS              | MS             | MS              | MS              | MS                  |
| Origin             | 2  | 0.096           | <b>0.002**</b> | <b>0.004***</b> | <b>14.03***</b> | 762                 |
| Cycling            | 1  | 0.029           | 0.000          | 0.001           | 2.32            | 1774                |
| Gen                | 1  | 0.026           | 0.000          | 0.000           | <b>5.43*</b>    | 108                 |
| Origin*Cycling     | 2  | 0.238           | <b>0.001*</b>  | <b>0.003**</b>  | 1.98            | 1927                |
| Origin*Gen         | 2  | 0.191           | 0.000          | 0.001           | 1.77            | <b>5522*</b>        |
| Cycling*Gen        | 1  | 0.045           | 0.000          | 0.001           | 1.74            | <b>9900*</b>        |
| Origin*Cycling*Gen | 2  | 0.113           | 0.000          | 0.001           | <b>3.33*</b>    | 4827                |
| Rep                | 3  | <b>0.896***</b> | <b>0.001*</b>  | <b>0.011***</b> | 0.86            | <b>12489***</b>     |
| Residual           | 73 | 0.099           | 0.000          | 0.000           | 0.99            | 1669                |

  

|                    | Df | Kernel no.    | Protein | Awne<br>ears     | Stem<br>length | Ear length    |
|--------------------|----|---------------|---------|------------------|----------------|---------------|
|                    |    | MS            | MS      | MS               | MS             | MS            |
| Origin             | 2  | 11.30         | 0.087   | 5.76             | 23.75          | 0.048         |
| Cycling            | 1  | 0.06          | 0.006   | 11.12            | 19.61          | 0.120         |
| Gen                | 1  | 3.05          | 0.132   | 2.49             | 21.15          | 0.002         |
| Origin*Cycling     | 2  | 6.49          | 0.488   | <b>200.44***</b> | 4.41           | 0.036         |
| Origin*Gen         | 2  | 7.51          | 0.125   | 4.20             | 3.31           | 0.048         |
| Cycling*Gen        | 1  | 10.74         | 0.020   | 1.31             | 3.82           | 0.407         |
| Origin*Cycling*Gen | 2  | <b>19.90*</b> | 0.042   | 3.36             | 13.68          | <b>0.348*</b> |
| Rep                | 3  | 4.52          | 0.098   | 0.75             | 15.88          | 0.221         |
| Residual           | 73 | 4.59          | 0.203   | 13.64            | 13.24          | 0.106         |

**Table S2.** Yield (t/ha), HI, RAUDPC, TKW (g), ear-bearing tillers/m<sup>2</sup> (Ears\_m2), kernel number per ear (Kernel no.), protein content (%), percentage of ears with awns (Awned ears (%)), stem length (cm) and ear length (cm) of the F<sub>13</sub> and F<sub>14</sub> winter wheat CCP entries in the experimental years 2014/15 (Neu-Eichenberg, Germany). Differing small letters indicate significant differences between CCP entries within each year. Differing capital letters indicate significant differences between the means of the experimental years.

|        | Yield (t/ha)    |                 | HI              |                 | RAUDPC          |                 | TKW (g)          |                 | Ears_m <sup>2</sup> |                 |
|--------|-----------------|-----------------|-----------------|-----------------|-----------------|-----------------|------------------|-----------------|---------------------|-----------------|
|        | F <sub>13</sub> | F <sub>14</sub> | F <sub>13</sub> | F <sub>14</sub> | F <sub>13</sub> | F <sub>14</sub> | F <sub>13</sub>  | F <sub>14</sub> | F <sub>13</sub>     | F <sub>14</sub> |
| D13NC  | 4.1 ab          | 4.1             | 0.38 ab         | 0.37 a          | 0.14 ab         | 0.10            | 45.7 c           | 44.2            | 367                 | 462             |
| DK13   | 4.5 b           | 4.4             | 0.40 abc        | 0.39 abc        | 0.09 a          | 0.10            | 45.0 bc          | 45.9            | 428                 | 388             |
| HU13   | 4.1 ab          | 4.4             | 0.38 a          | 0.39 abc        | 0.12 ab         | 0.10            | 44.4 abc         | 45.6            | 412                 | 427             |
| TUM13  | 4.3 ab          | 4.4             | 0.38 ab         | 0.39 abc        | 0.11 ab         | 0.11            | 46.1 c           | 45.4            | 439                 | 441             |
| HU13NC | 4.2 ab          | 4.2             | 0.40 abc        | 0.40 abc        | 0.17 b          | 0.15            | 43.3 ab          | 44.8            | 417                 | 418             |
| F13    | 4.3 ab          | 4.2             | 0.41 abc        | 0.42 c          | 0.12 ab         | 0.12            | 45.0 bc          | 44.7            | 434                 | 373             |
| UK13   | 4.4 ab          | 4.1             | 0.39 abc        | 0.39 abc        | 0.12 ab         | 0.13            | 44.7 bc          | 45.6            | 431                 | 388             |
| UK13NC | 4.3 ab          | 4.2             | 0.41 bc         | 0.41 bc         | 0.09 a          | 0.11            | 44.1 abc         | 44.2            | 435                 | 441             |
| CH13   | 3.9 ab          | 4.2             | 0.39 abc        | 0.38 ab         | 0.12 ab         | 0.13            | 44.7 bc          | 44.6            | 392                 | 407             |
| D13    | 3.7 a           | 4.2             | 0.39 abc        | 0.37 a          | 0.12 ab         | 0.11            | 42.5 a           | 44.5            | 414                 | 402             |
| NL13   | 4.4 ab          | 4.4             | 0.42 c          | 0.40 bc         | 0.11 ab         | 0.13            | 42.9 ab          | 44.2            | 400                 | 448             |
| Mean   | 4.2             | 4.2             | 0.40            | 0.39            | 0.12            | 0.12            | 44.4 A           | 44.9 B          | 415                 | 417             |
|        | Kernel no.      |                 | Protein (%)     |                 | Awned ears (%)  |                 | Stem length (cm) |                 | Ear length (cm)     |                 |
|        | F <sub>13</sub> | F <sub>14</sub> | F <sub>13</sub> | F <sub>14</sub> | F <sub>13</sub> | F <sub>14</sub> | F <sub>13</sub>  | F <sub>14</sub> | F <sub>13</sub>     | F <sub>14</sub> |
| D13NC  | 27 ab           | 22 a            | 9.7             | 9.8             | 11 c            | 10 bc           | 89.9 ab          | 87.8 ab         | 7.68                | 7.08 a          |
| DK13   | 27 ab           | 28 b            | 9.5             | 9.5             | 3 a             | 4 ab            | 88.4 ab          | 90.3 ab         | 7.49                | 7.88 b          |
| HU13   | 23 a            | 25 ab           | 9.5             | 9.6             | 10 bc           | 10 bc           | 85.7 ab          | 89.6 ab         | 7.33                | 7.56 ab         |
| TUM13  | 25 ab           | 25 ab           | 10.0            | 9.9             | 9 bc            | 6 abc           | 91.3 b           | 91.8 ab         | 7.44                | 7.58 ab         |
| HU13NC | 26 ab           | 26 ab           | 10.0            | 9.7             | 12 c            | 11 c            | 86.6 ab          | 88.0 ab         | 7.51                | 7.61 ab         |
| F13    | 25 ab           | 28 b            | 9.9             | 9.3             | 2 a             | 4 a             | 83.9 a           | 86.7 a          | 7.51                | 7.77 ab         |
| UK13   | 26 ab           | 26 ab           | 9.7             | 9.8             | 10 bc           | 8 abc           | 92.0 b           | 88.3 ab         | 7.56                | 7.45 ab         |
| UK13NC | 27 ab           | 27 b            | 9.7             | 9.4             | 3 a             | 5 ab            | 86.8 ab          | 88.3 ab         | 7.59                | 7.47 ab         |
| CH13   | 25 ab           | 24 ab           | 10.1            | 9.8             | 15 c            | 11 c            | 90.7 ab          | 89.6 ab         | 7.65                | 7.56 ab         |
| D13    | 26 ab           | 25 ab           | 10.1            | 10.1            | 10 bc           | 11 c            | 91.5 b           | 94.1 b          | 7.71                | 7.77 ab         |
| NL13   | 29 b            | 26 ab           | 9.5             | 9.7             | 5 ab            | 8 abc           | 84.1 a           | 87.4 ab         | 7.50                | 7.35 ab         |
| Mean   | 26              | 26              | 9.8             | 9.7             | 7               | 7               | 88.3             | 89.2            | 7.54                | 7.55            |

**Table S3.** ANOVA results of the origin (D, HU, UK) and cycling history effects on the F<sub>13</sub> winter wheat CCPs of 2013/14 and 2014/15 (Neu-Eichenberg), including mean squares (MS) and significance levels (\*p<0.05, \*\*p<0.01, \*\*\*p<0.001). Significant effects are marked in bold.

|                     | Df | Yield          | HI              | RAUDPC          | TKW             | Ears_m <sup>2</sup> |
|---------------------|----|----------------|-----------------|-----------------|-----------------|---------------------|
|                     |    | MS             | MS              | MS              | MS              | MS                  |
| Origin              | 2  | 0.22           | 0.001           | <b>0.003***</b> | <b>19.5***</b>  | 1318                |
| Cycling             | 1  | 0.03           | 0.000           | 0.001           | 1.03            | 4517                |
| Year                | 1  | <b>5.86***</b> | 0.000           | <b>0.098***</b> | <b>8.32*</b>    | 47                  |
| Origin*Cycling      | 2  | <b>0.68*</b>   | 0.000           | <b>0.002**</b>  | <b>14.16***</b> | 2703                |
| Origin*Year         | 2  | 0.16           | 0.000           | 0.000           | 1.11            | <b>6366*</b>        |
| Cycling*Year        | 1  | 0.02           | 0.000           | 0.001           | 0.66            | 96                  |
| Rep(Year)           | 6  | <b>0.69***</b> | <b>0.001***</b> | <b>0.003***</b> | <b>5.85**</b>   | <b>9802***</b>      |
| Origin*Cycling*Year | 2  | 0.15           | 0.000           | 0.001           | 3.39            | 4494                |
| Residual            | 70 | 0.15           | 0.000           | 0.000           | 1.73            | 1509                |

  

|                     | Df | Kernel no.       | Protein        | Awne<br>ears     | Stem<br>length   | Ear length      |
|---------------------|----|------------------|----------------|------------------|------------------|-----------------|
|                     |    | MS               | MS             | MS               | MS               | MS              |
| Origin              | 2  | 5.95             | 0.17           | 3.92             | 10.00            | 0.04            |
| Cycling             | 1  | 3.04             | 0.00           | 9.72             | 4.78             | 0.04            |
| Year                | 1  | <b>317.01***</b> | 0.10           | 0.17             | <b>723.29***</b> | <b>16.89***</b> |
| Origin*Cycling      | 2  | 0.70             | <b>0.59*</b>   | <b>296.91***</b> | 5.20             | 0.15            |
| Origin*Year         | 2  | 5.31             | 0.08           | 5.61             | 8.00             | 0.04            |
| Cycling*Year        | 1  | 1.65             | 0.01           | 0.86             | 0.08             | 0.01            |
| Rep(Year)           | 6  | <b>9.35*</b>     | <b>1.33***</b> | 14.57            | 48.03            | <b>0.27***</b>  |
| Origin*Cycling*Year | 2  | 2.30             | 0.06           | 2.44             | 14.66            | 0.02            |
| Residual            | 70 | 3.50             | 0.18           | 19.78            | 22.55            | 0.06            |

**Table S4.** Yield (t/ha), HI, RAUDPC, TKW (g), ear-bearing tillers/m<sup>2</sup> (Ears\_m2), kernel number per ear (Kernel no.), protein content (%), percentage of ears with awns (Awned ears (%)), stem length (cm) and ear length (cm) of the F<sub>13</sub> winter wheat CCP entries in the experimental years 2013/14 and 2014/15 (Neu-Eichenberg, Germany). Differing small letters indicate significant differences between CCP entries within each year. Differing capital letters indicate significant differences between the means of the experimental years.

|        | Yield (t/ha) |         | HI          |          | RAUDPC         |         | TKW (g)          |          | Ears_m <sup>2</sup> |         |
|--------|--------------|---------|-------------|----------|----------------|---------|------------------|----------|---------------------|---------|
|        | 2013/14      | 2014/15 | 2013/14     | 2014/15  | 2013/14        | 2014/15 | 2013/14          | 2014/15  | 2013/14             | 2014/15 |
| D13NC  | 4.9 ab       | 4.1     | 0.39 a      | 0.38 ab  | 0.05 ab        | 0.14 ab | 45.9 c           | 45.7 bc  | 399                 | 367     |
| DK13   | 5.0 b        | 4.5     | 0.41 ab     | 0.40 abc | 0.04 a         | 0.09 a  | 44.9 bc          | 45.0 abc | 442                 | 428     |
| HU13   | 4.5 ab       | 4.1     | 0.40 ab     | 0.38 a   | 0.06 ab        | 0.12 ab | 43.3 abc         | 44.4 abc | 396                 | 412     |
| TUM13  | 4.9 ab       | 4.3     | 0.39 a      | 0.38 ab  | 0.04 a         | 0.11 ab | 44.1 abc         | 46.1 c   | 420                 | 439     |
| HU13NC | 4.3 ab       | 4.2     | 0.40 ab     | 0.40 abc | 0.07 ab        | 0.17 b  | 41.7 a           | 43.3 ab  | 389                 | 417     |
| F13    | 4.6 ab       | 4.3     | 0.40 ab     | 0.41 abc | 0.05 ab        | 0.12 ab | 43.3 ab          | 45.0 abc | 379                 | 434     |
| UK13   | 4.9 ab       | 4.4     | 0.39 a      | 0.39 ab  | 0.08 b         | 0.12 ab | 45.0 bc          | 44.7 abc | 397                 | 431     |
| UK13NC | 5.0 b        | 4.3     | 0.40 ab     | 0.41 bc  | 0.04 ab        | 0.09 a  | 42.7 ab          | 44.1 abc | 407                 | 435     |
| CH13   | 4.8 ab       | 3.9     | 0.39 ab     | 0.39 abc | 0.05 ab        | 0.12 ab | 45.2 bc          | 44.7 abc | 442                 | 392     |
| D13    | 4.2 a        | 3.7     | 0.38 a      | 0.39 abc | 0.06 ab        | 0.12 ab | 43.4 abc         | 42.5 a   | 453                 | 414     |
| NL13   | 4.7 ab       | 4.4     | 0.43 b      | 0.42 c   | 0.04 a         | 0.11 ab | 42.0 a           | 42.9 a   | 425                 | 400     |
| Mean   | 4.7 B        | 4.2 A   | 0.39        | 0.40     | 0.05 A         | 0.12 B  | 43.8 A           | 44.4 B   | 414                 | 415     |
|        | Kernel no.   |         | Protein (%) |          | Awned ears (%) |         | Stem length (cm) |          | Ear length (cm)     |         |
|        | 2013/14      | 2014/15 | 2013/14     | 2014/15  | 2013/14        | 2014/15 | 2013/14          | 2014/15  | 2013/14             | 2014/15 |
| D13NC  | 29 ab        | 27 bc   | 9.6         | 9.7      | 11 cd          | 11 bc   | 92.2 abc         | 89.9 ab  | 8.56                | 7.68    |
| DK13   | 31 ab        | 27 bc   | 9.6         | 9.5      | 1 a            | 3 a     | 93.2 abcd        | 88.4 ab  | 8.48                | 7.49    |
| HU13   | 29 ab        | 23 a    | 9.6         | 9.5      | 7 abcd         | 10 bc   | 91.6 abc         | 85.7 ab  | 8.13                | 7.33    |
| TUM13  | 29 ab        | 25 ab   | 9.9         | 10.0     | 11 cd          | 9 abc   | 97.1 bcd         | 91.3 ab  | 8.55                | 7.44    |
| HU13NC | 30 ab        | 26 abc  | 10.1        | 10.0     | 14 d           | 12 bc   | 94.5 bcd         | 86.6 ab  | 8.44                | 7.51    |
| F13    | 32 b         | 25 ab   | 9.5         | 9.9      | 4 abc          | 2 a     | 90.0 ab          | 83.9 a   | 8.43                | 7.51    |
| UK13   | 28 a         | 26 bc   | 9.8         | 9.7      | 9 bcd          | 10 bc   | 95.4 bcd         | 92.0 b   | 8.29                | 7.56    |
| UK13NC | 30 ab        | 27 bc   | 9.4         | 9.7      | 3 ab           | 3 a     | 94.1 bcd         | 86.8 ab  | 8.30                | 7.59    |
| CH13   | 30 ab        | 25 ab   | 9.5         | 10.1     | 11 cd          | 15 c    | 99.1 cd          | 90.7 ab  | 8.51                | 7.65    |
| D13    | 28 a         | 26 bc   | 10.2        | 10.1     | 12 cd          | 10 bc   | 100.5 d          | 91.5 ab  | 8.56                | 7.71    |
| NL13   | 30 ab        | 29 c    | 9.5         | 9.5      | 8 bcd          | 5 ab    | 86.2 a           | 84.1 a   | 8.33                | 7.50    |
| Mean   | 30 B         | 26 A    | 9.7         | 9.8      | 7              | 7       | 94.0 B           | 88.3 A   | 8.42 B              | 7.54 A  |

**Table S5.** Grain protein deviation (GPD) of the reference varieties and winter wheat CCP entries of the F<sub>13</sub> in 2013/14 and F<sub>13</sub> and F<sub>14</sub> in 2014/15 (Neu-Eichenberg, Germany). Differing small letters indicate significant differences between reference varieties and CCP entries within each year and generation.

| Origin     | Entry  | GPD             |  |                 |                 |
|------------|--------|-----------------|--|-----------------|-----------------|
|            |        | 2013/14         |  | 2014/15         |                 |
|            |        | F <sub>13</sub> |  | F <sub>13</sub> | F <sub>14</sub> |
| References | Achat  | -0.70 a         |  | 0.41 ab         | 0.41 ab         |
|            | Akteur | 1.99 b          |  | 1.54 b          | 1.54 b          |
|            | Capo   | -0.58 a         |  | -0.19 ab        | -0.19 ab        |
| D          | D13NC  | -0.07 a         |  | -0.20 ab        | 0.03 ab         |
|            | DK13   | -0.07 a         |  | -0.50 a         | -0.53 a         |
|            | HU13   | -0.28 a         |  | -0.67 a         | -0.28 ab        |
|            | TUM13  | 0.34 ab         |  | 0.42 ab         | 0.23 ab         |
| HU         | HU13NC | 0.65 ab         |  | 0.40 ab         | -0.15 ab        |
|            | F13    | -0.38 a         |  | 0.22 ab         | -0.94 a         |
|            | UK13   | 0.24 ab         |  | -0.25 ab        | -0.01 ab        |
| UK         | UK13NC | -0.58 a         |  | -0.21 ab        | -0.76 a         |
|            | CH13   | -0.29 a         |  | 0.41 ab         | 0.01 ab         |
|            | D13    | 0.79 ab         |  | 0.45 ab         | 0.65 ab         |
|            | NL13   | -0.37 a         |  | -0.51 a         | -0.21 ab        |

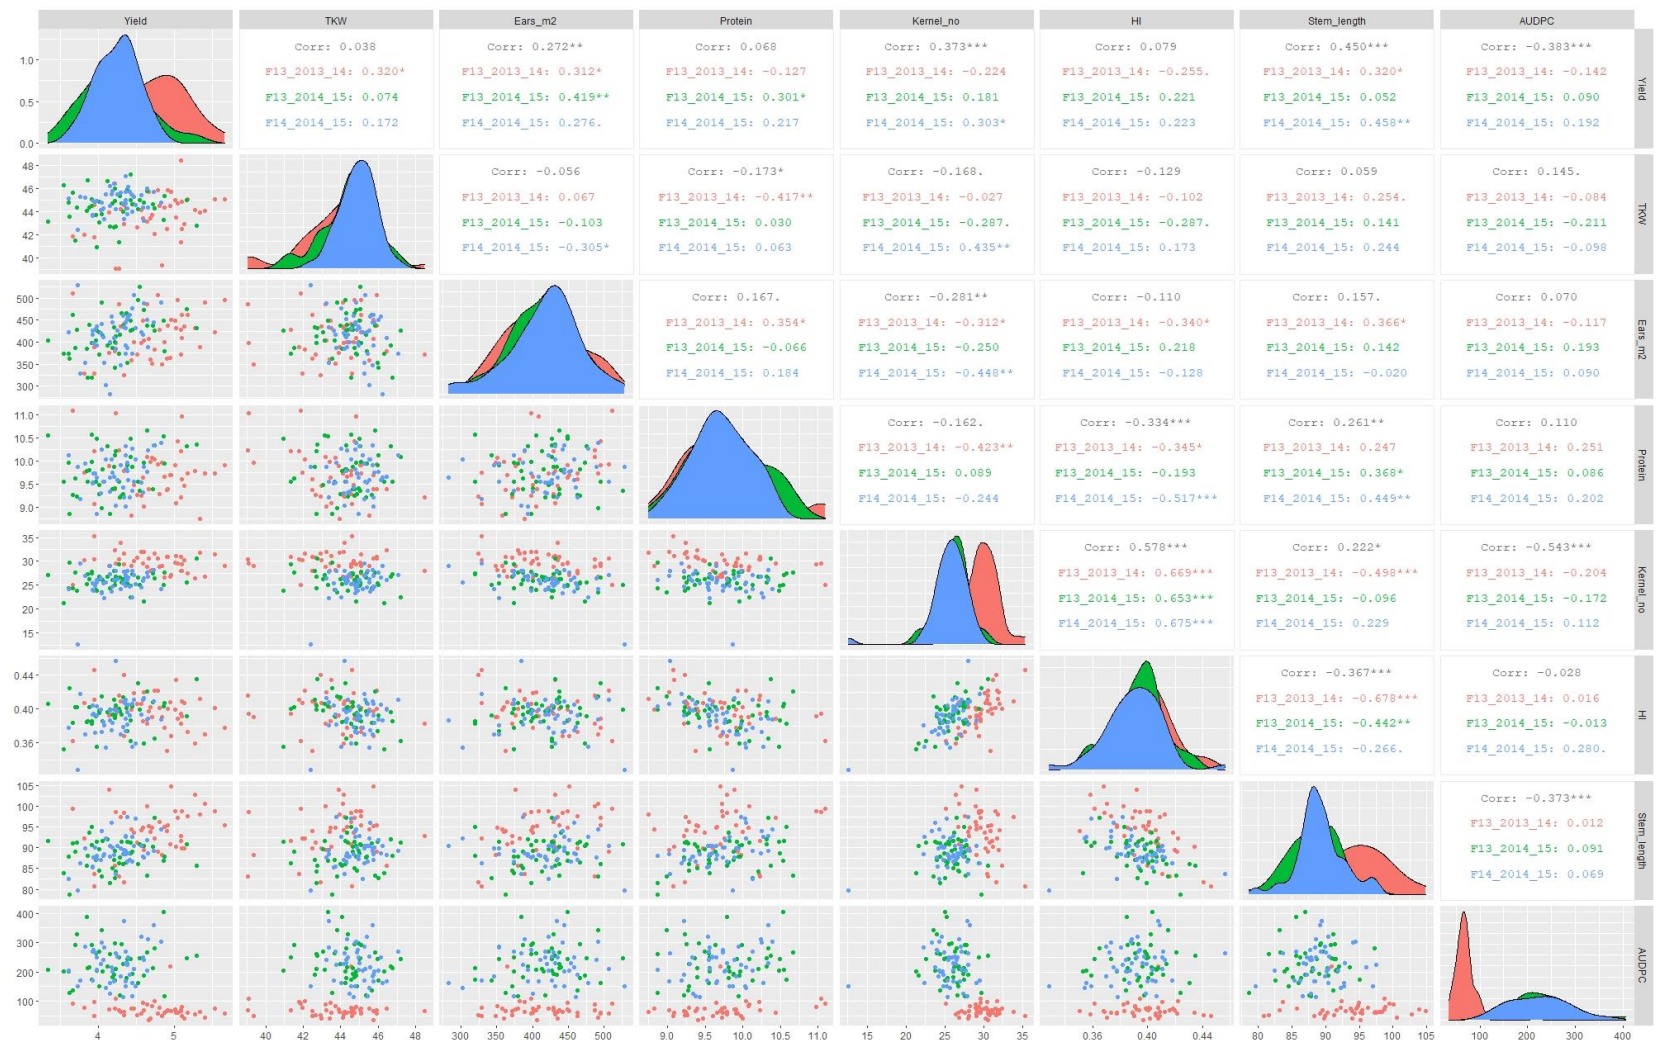

**Figure S1.** Correlation coefficients (r) for various agronomic parameters for the winter wheat CCP entries over all generations and experimental years (black), of the F<sub>13</sub> in 2013/14 (red), of the F<sub>13</sub> in 2014/15 (green) and of the F<sub>14</sub> in 2014/15 (blue) (Neu-Eichenberg, Germany). Asterisks indicate significance of the correlation (\*p<0.05, \*\*p<0.01, \*\*\*p<0.001).

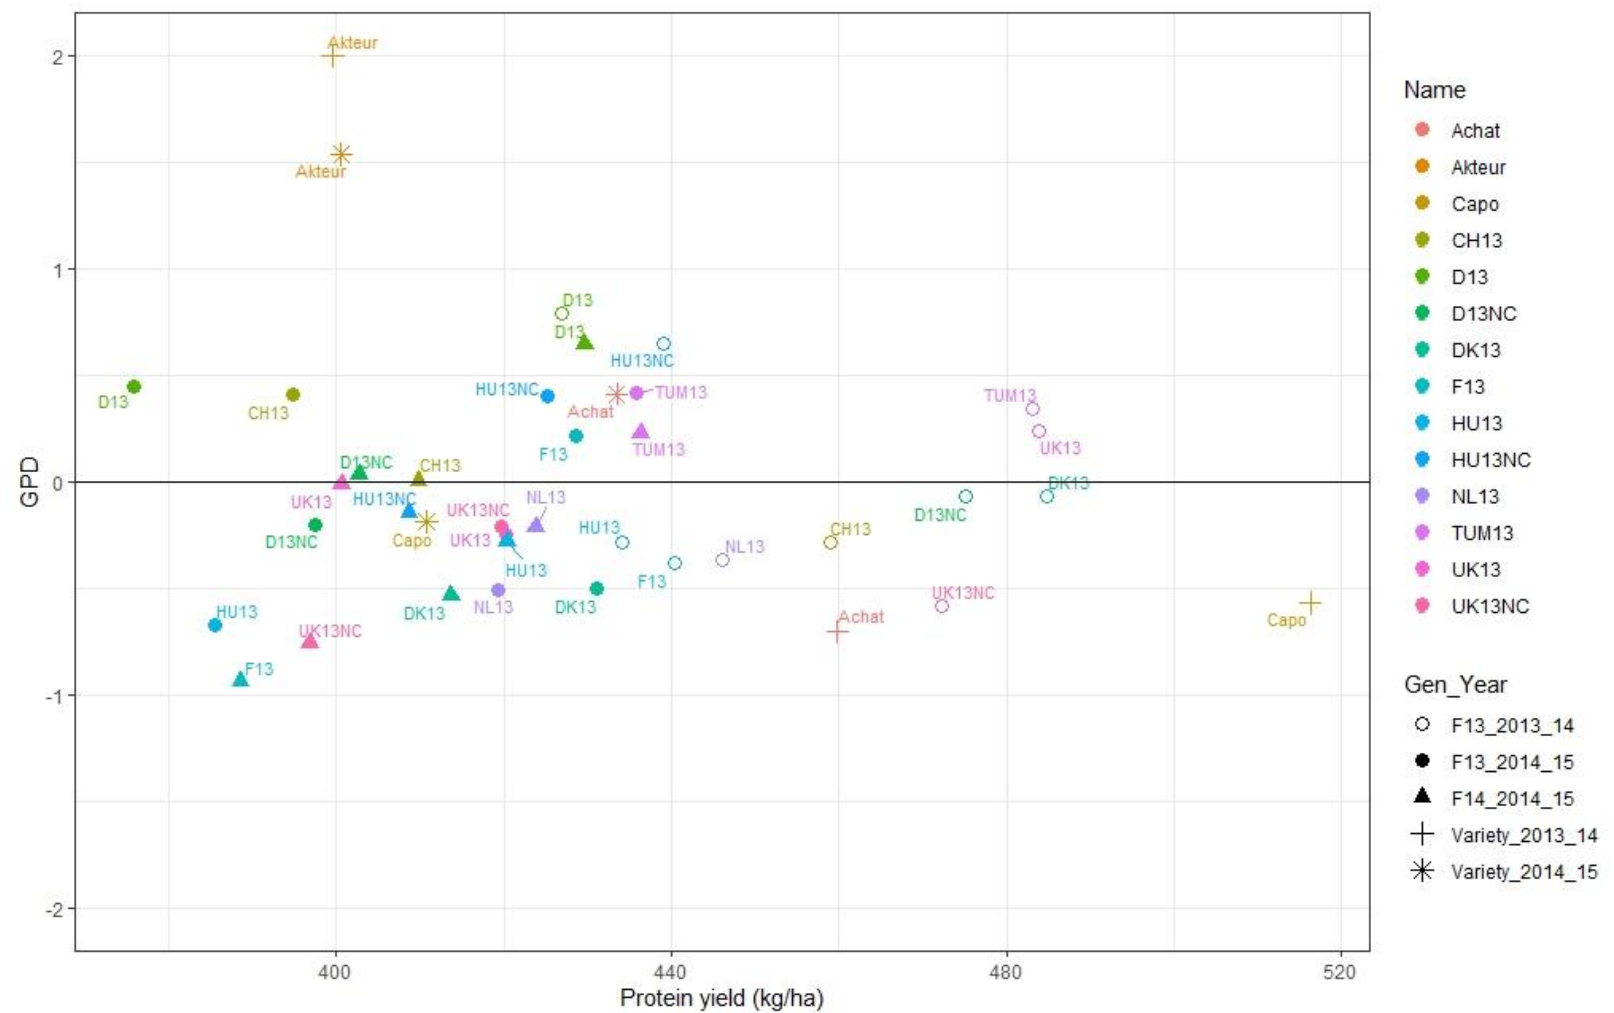

**Figure S2.** Grain protein deviation (GPD) and protein yield (kg/ha) of the experimental entries (winter wheat CCPs and reference varieties) in the A) F<sub>13</sub> of 2013/14 and 2014/15 and B) F<sub>14</sub> of 2014/15 (Neu-Eichenberg, Göttingen).
